# Supplementary material
Source: publisher figshare collection journal article supplement (https://acs.figshare.com/ndownloader/files/4463170)
Supplement: Supplementary file 1 [file 4463170]

# Supporting Information

## Fluorescent Coordination Polymeric Gel from Tartaric Acid Assisted Self-Assembly

*Sudip K. Batabyal, Wei Lee Leong, and Jagadese J. Vittal*

*Department of Chemistry, National University of Singapore, Singapore 117543*

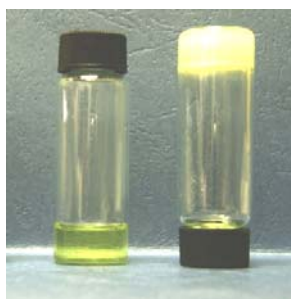

**Figure S1.** The photographs of  $[\text{Zn}(\text{bpd})(\text{OAc})_2]$  solution (left) and organogel **1** (right).

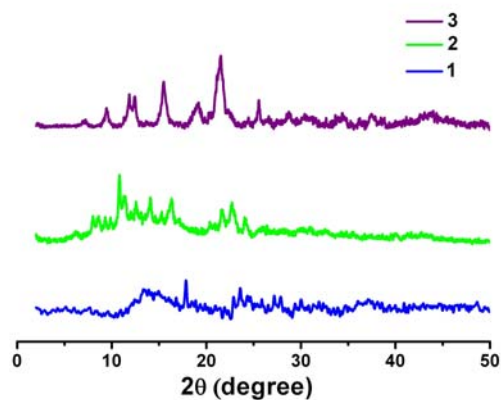

**Figure S2.** XRPD patterns of dried gel **1** and powder of **2** and **3**.

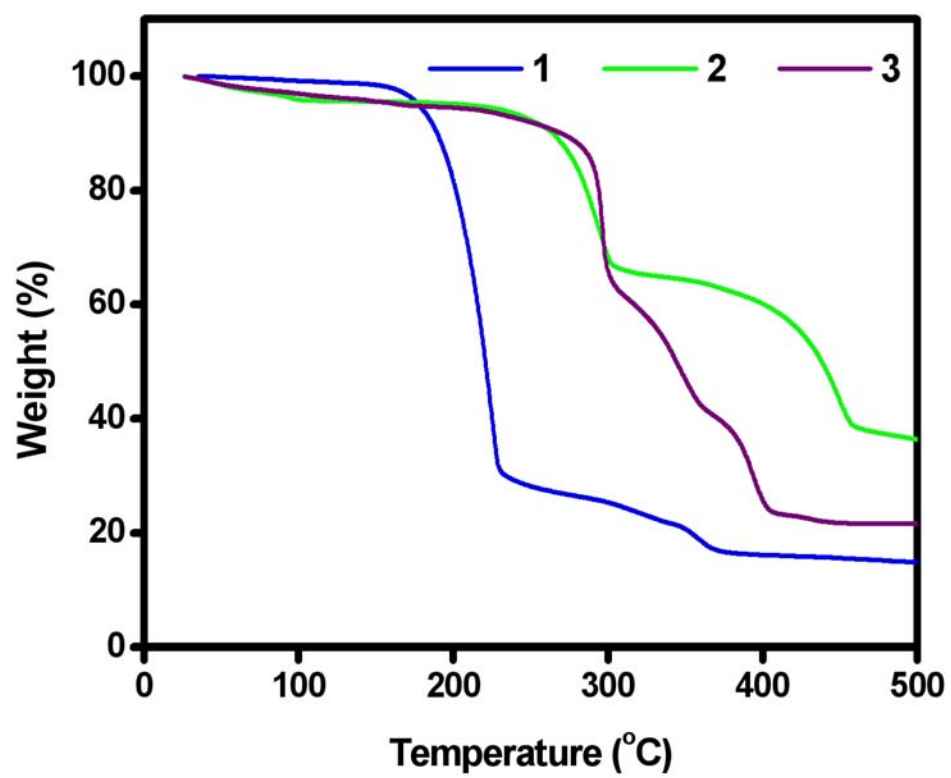

**Figure S3.** TGA of complexes **1**, **2** and **3**.

## Compound 1

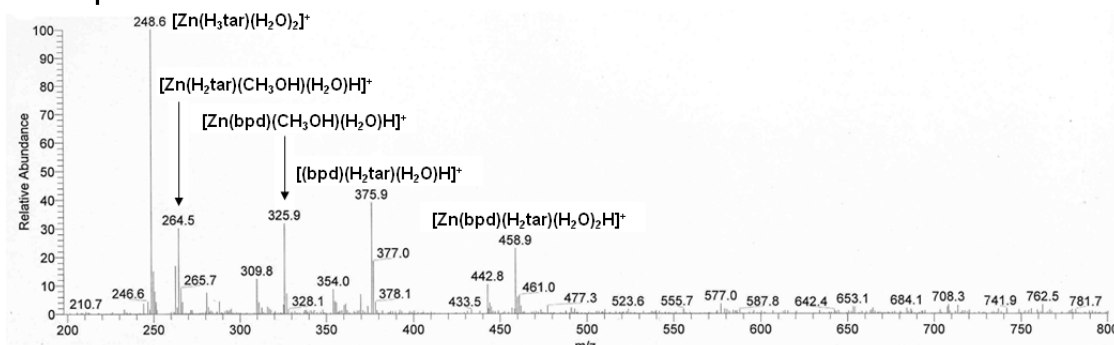

## Compound 2

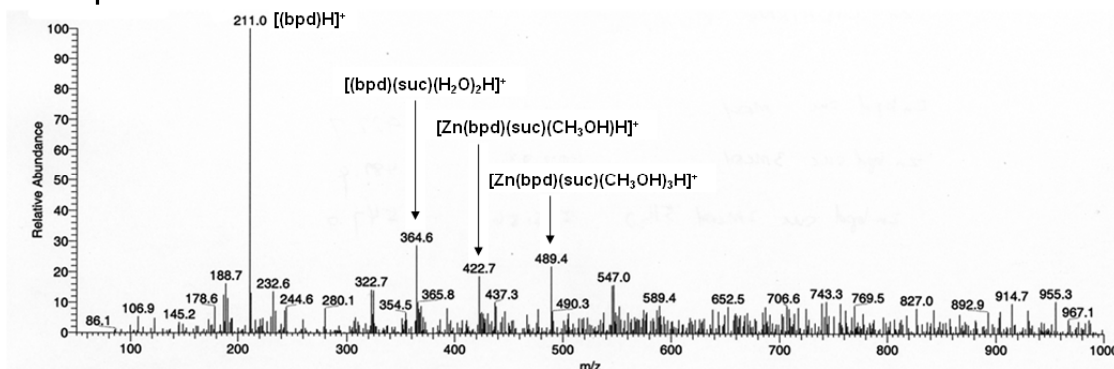

## Compound 3

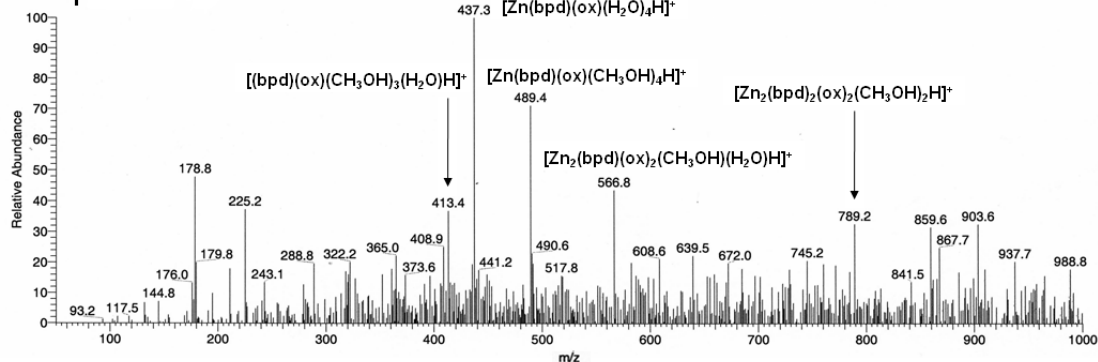

**Figure S4.** ESI-MS spectra of complexes **1**, **2** and **3**.

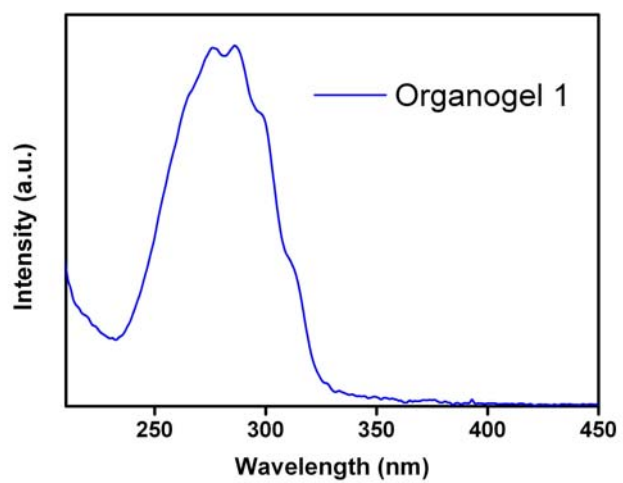

**Figure S5.** UV-vis spectra of organogel **1**.
